# Supplementary material for: Measurement report: Comparison of wintertime individual particles at ground level and above the mixed layer in urban Beijing
Source: Copernicus journal article supplement (doi:10.5194/acp-2020-1031), 2020-11-30
Supplement: Supplementary file 1 [file acp-2020-1031-supplement.pdf]

# **Measurement report: Comparison of wintertime individual particles at ground level and above the mixed layer in urban Beijing**

**Wenhua Wang<sup>1, 2, 3</sup>, Longyi Shao<sup>1\*</sup>, Claudio Mazzoleni<sup>3</sup>, Yaowei Li<sup>1</sup>, Simone Kotthaus<sup>4</sup>, Sue Grimmond<sup>4</sup>,  
Janarjan Bhandari<sup>3</sup>, Jiaoping Xing<sup>1, 5</sup>, Xiaolei Feng<sup>1</sup>, Mengyuan Zhang<sup>1</sup>, Zongbo Shi<sup>6</sup>**

1. State Key Laboratory of Coal Resources and Safe Mining & College of Geosciences and Surveying Engineering, China University of Mining and Technology, Beijing, 100083, China

2. School of Resources and Materials, Northeastern University at Qinhuangdao, Qinhuangdao, 066004, China

3. Atmospheric Sciences Program & Physics Department, Michigan Technological University, Houghton, 49931, USA

4. Department of Meteorology, University of Reading, Reading, RG6 6BB, UK

5. School of Forestry, Jiangxi Agricultural University, Nanchang, 330045, China

6. School of Geography Earth and Environmental Sciences, the University of Birmingham, Birmingham, B15 2TT, UK

\* Corresponding author: ShaoL@cumtb.edu.cn

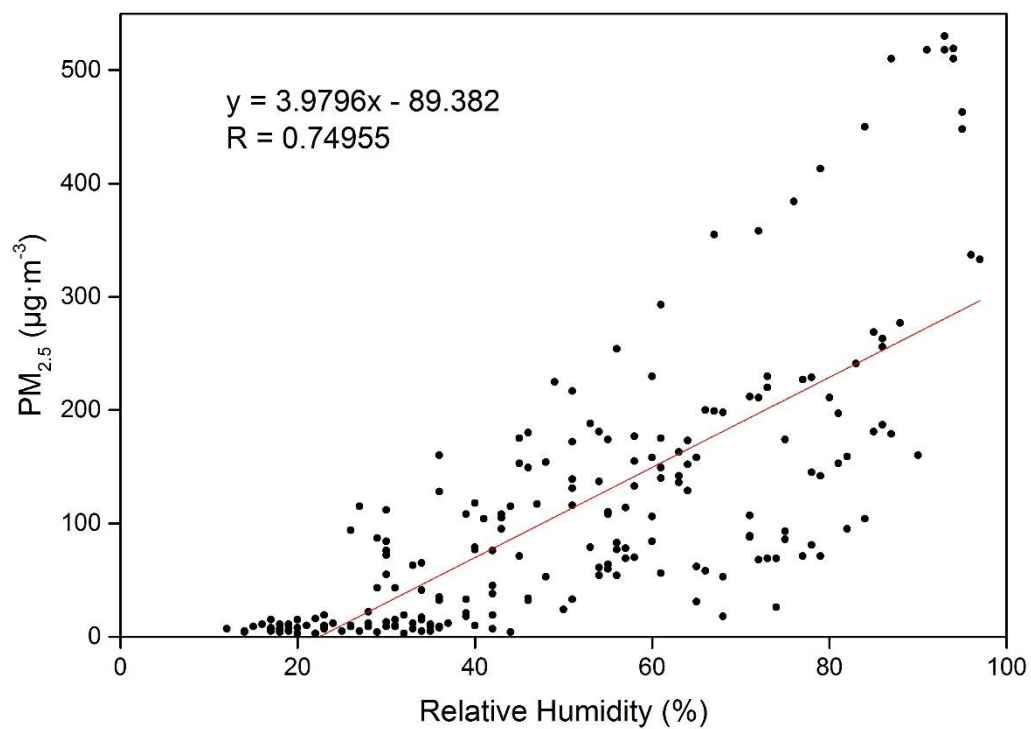

Fig. S1: Correlation between PM<sub>2.5</sub> mass concentration and relative humidity

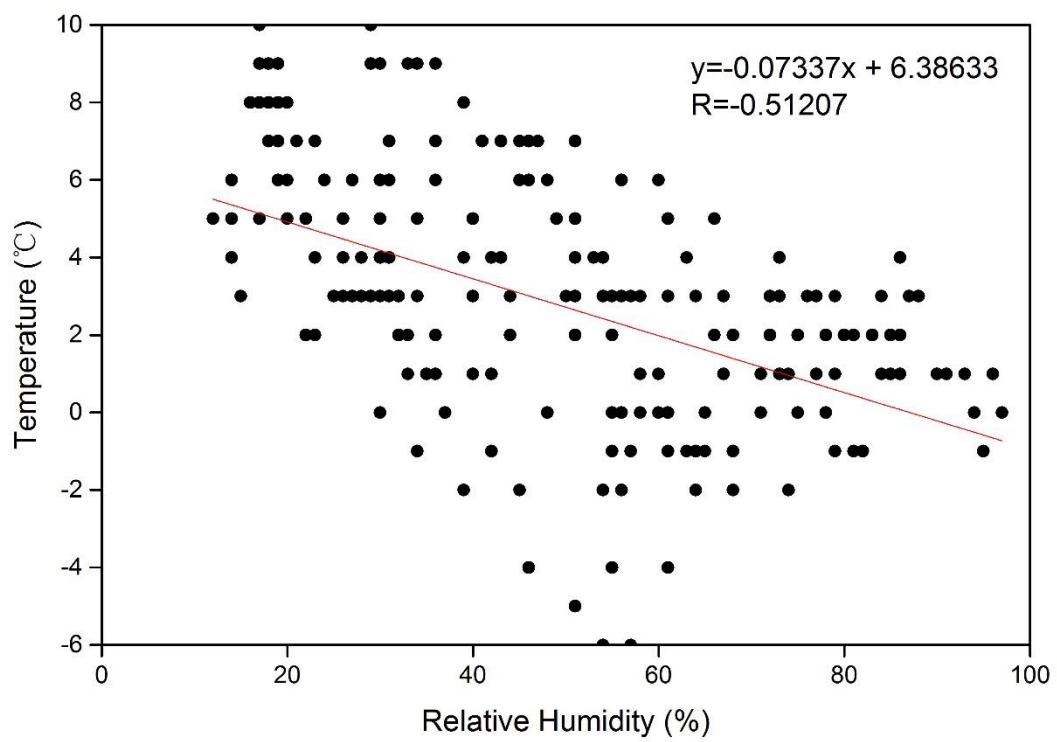

Fig. S2: Correlation between temperature and relative humidity

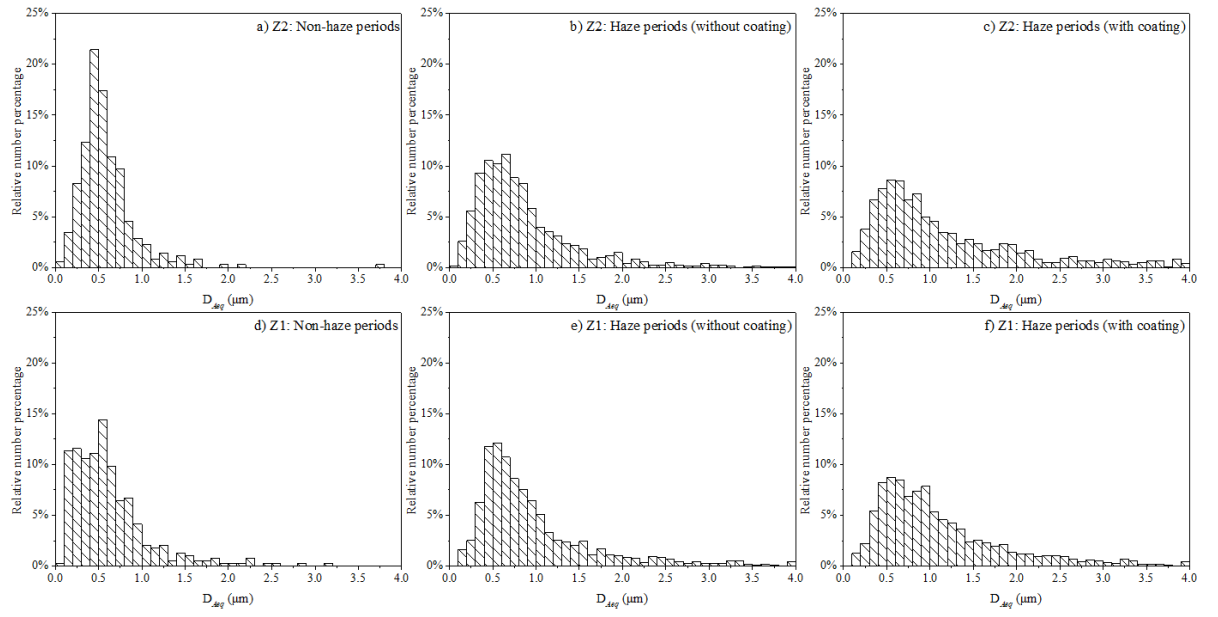

Fig. S3: Size distributions of individual particles in clear days and hazy days. b) and e) were all analyzed particle size distributions without calculating the coating size, c) and f) were all analyzed particle size distributions calculating the coating size.
