# Supplementary material for: Measurement report: Comparison of wintertime individual particles at ground level and above the mixed layer in urban Beijing
Source: Copernicus journal article supplement (doi:10.5194/acp-2020-1031), 2020-11-30
Supplement: Supplementary file [file acp-2020-1031-AC2-supplement.pdf]

Reply to the Reviewer's comments

Dear Editor,

We thank the reviewers for their insightful comments and positive feedback. We have revised our manuscript according to the suggestions. In the following section we give our answer (text in blue) to each of the points addressed by the reviewers. New text applied to meet the requests of the review is highlighted in red in the manuscript.

**Reviewer 2:**

This manuscript presents work analyzing the characteristics of aerosol particles collected at two different heights (ground level and above the mixed layer height) in Beijing. The samples analyzed using TEM and EDS to generate both images of the particles as well as elemental composition. The samples are compared between two different types of environments: haze and non-haze. Classes of compounds that were identified include mineral, organic particles, soot particles, particles that contained sulfur (both alone and mixed) as well as other types of internally mixed particles. The results from this study are interesting and the figures and discussion are clearly written. However, there are a few locations where more information or a clarification of statements would improve understanding. I would recommend acceptance after addressing the following minor concerns.

Specific Comments:

1. For the EDS analysis, were multiple places on the particles probed? It looks like they were based on the data in Figure 2. On page 5 line 128, you mention that the duration was 15 s to reduce damage.

Please also include information in the methods on how many spots per particle were sampled.

Reply: For most of the particles, we only collected one spectrum and we adjusted the spot size of beam according to the size of the particles. Therefore, we obtained the average elemental compositions of each particles. However, more than one spots per particles were sampled if the particles were inhomogeneous particles according to the TEM images. We have added some sentences in the methods part. Please line 130-134 in the manuscript.

2. For the area equivalent diameter calculations described on line 134 you are assuming particles are spherical. However, there are clearly non spherical particles in the figures. Please clarify what assumptions are being made and the uncertainty that can come from those assumptions in reporting

the size distributions.

Reply: Yes, there are non-spherical particles in the atmosphere. We cannot acquire the aerodynamic diameter distribution of particles according to the micrograph. There are some methods to calculate the diameter of particles, for example, the average of length and width of a bounding rectangle of the measured particles and area equivalent diameter. We calculated the area equivalent diameter assuming particles are spherical. These assumptions have been used in many previous microscopic studies as below:

(1) Zihan Wang, Wei Hu, and Hongya Niu., et al. (2021). Variations in physicochemical properties of airborne particles during a heavy haze-to-dust episode in Beijing. *Science of the Total Environment*.

(2) Liang Xu, Daizhou Zhang and Weijun Li. (2019). Microscopic comparison of aerosol particles collected at an urban site in North China and a coastal site in Japan. *Science of the Total Environment*.

(3) Florin Unga, Marie Choël, and Yevgeny Derimian<sup>1</sup>, (2018). Microscopic observations of core-shell particle structure and implications for atmospheric aerosol remote sensing. *Journal of Geophysical Research: Atmospheric*.

(4) Janarjan Bhandari, Swarp China, and Kamal Kant., (2019). Extensive soot compaction by cloud processing from laboratory and field observations. *Scientific Report*.

(5) Wenhua Wang, Longyi Shao, and Jiaoping Xing., (2018). Physicochemical characteristics of individual aerosol particles during the 2015 China Victory Day Parade in Beijing. *Atmosphere*.

(6) Zongbo Shi, Longyi Shao, and T.P. Jones., (2003). Characterization of airborne individual particles collected in an urban area, a satellite city and a clean air area in Beijing, 2001. *Atmospheric Environment*.

3. On page 6 lines 160-161 and also throughout the summary, statements are made about the organic particles (OP) coming from coal combustion or biomass and fossil fuel. How is this known? I agree that this could be a source, but how can you rule out other sources like secondary organic aerosol? Please clarify how this assignment of the source for these particles is being made.

Reply: We admit that OPs might have different sources, but the combustion of coal or biomass and fossil fuel are the major sources in Beijing, which has been summarized by Li et al., (2016). We have rearranged the sentences to emphasize that OPs are mainly from coal combustion or biomass and fossil fuel. Please see line 169-170

Firstly, these spherical organic particles (OP) are stable under strong electron beam irradiation,

which is different from the secondary aerosols. Secondly, they appear dark features in the TEM images, which reflect their high thickness and refractory. Therefore, this kind of OP are primary particles instead of secondary aerosols. Please see line 283-288.

Li, W., Shao, L., Zhang, D., Ro, C.-U., Hu, M., Bi, X., Geng, H., Matsuki, A., Niu, H., and Chen, J.: A review of single aerosol particle studies in the atmosphere of East Asia: morphology, mixing state, source, and heterogeneous reactions, *Journal of Cleaner Production*, 112, 1330-1349, 10.1016/j.jclepro.2015.04.050, 2016a.

4. In section 3.4 a comparison is made between samples at ground level and the samples collected on the tower. The averages are used for these comparisons, but some of the samples look like that trend is consistent across all the samples, and for others there is more variation. Please clarify where there is consistency and where there is more variation between the trends discussed for the average values.

Reply: We have rearranged the sentences. Please see line below in red and line 215-231.

We found that the relative number percentage of mineral particles at ground level was larger than that above the MLH. For example, mineral particles at ground level and above the MLH during non-haze periods accounted for 42.5% and 23.2%, respectively, and during haze periods the values are 18.1% and 9.5%, respectively. S-rich particles during non-haze periods accounted for 20.0% at ground level, less than the value of 30.7% above the MLH. However, not all the samples above the MLH during haze periods showed higher relative number percentage of S-rich particles than at ground level. This might because some of the S-rich particles above the MLH were mixed with other particles, forming mixed particles. Another reason might be that higher relative number percentage of mixed particles diluted the relative number percentage of S-rich particles. The mixed particles during haze periods accounted for 32.0% above the MLH, higher than that of 21.9% at ground level. We also found that OPs above the MLH accounted for higher relative number percentage than at ground level, although there was some variance. For example, samples 4 and 6 showed higher relative number percentage of OPs at ground level. That might because that some of the OPs were mixed with S-rich particles and OP-S showed higher relative number percentage above the MLH than at ground level in samples 4 and 6. Metals and soot only accounted for a few relative number percentages in all samples and they didn't show much difference at ground level and above the MLH.

5. On page 8, line 226: “In this study, we found that the core-shell structured particles accounted for 20% during haze periods but only 2% during non-haze periods”. Was this for the average of both heights? Or only one of the sample types (ground vs. tower)?

Reply: The value is the average of both heights. We emphasize that more core-shell particles were found during haze periods. We have added some sentence to show more details about the relative number percentage of core-shell particles. Please see below in red and line 241-245.

In this study, we found that the core-shell structured particles accounted for 20% during haze periods with 17% at ground level and 23% above the MLH, but only 2% during non-haze periods. These results demonstrated a general trend that the core-shell structured particles during haze periods were much higher than during non-haze periods.

6. The area equivalent diameter is larger during haze periods (line 227-228). I can also see that more of the particles above the MLH have a thin coating surrounding them (Figure 5). However, the viscosity and the flattening behavior of these particles is not discussed. A more liquid-like coating will flatten more when the particle is impacted (collected), leading to a larger observed diameter on the substrate. This should be mentioned in the text and the effect of this on the calculated diameters and assumptions about coating thicknesses (amounts of aging in the manuscript) should be discussed. It is possible that the particles are actually quite similar in size, but that the physical properties of the films are different between the two heights. Was there a difference in RH during collection on the tower vs. at ground level? A different RH could mean more water associated with the particles and potentially a difference in viscosity for the coating.

Reply: We admit that the particles collected by impaction may potentially be flattened. The absolute diameter of the flattened particles may be different from the diameter of the particle in the atmosphere. However, in this study, we compared the size distribution of particles before and after coating and emphasize that the particle size will increase when the particles are coated. We did not find obvious size difference between ground level and above the MLH.

7. Minor comments:

a. The green color on Figure 1 is hard to see

Reply: Changed.

b. Add an explanation to the caption on Figure S3 to explain what it means to calculate the coating size.

Reply: We have added an explanation to the caption on Fig. S3.

In the text it is discussed as an R value, but in Figure 6 it is the C/S ratio.

Reply: we replaced the C/S ratio with the R value throughout the entire manuscript.

c. Are the times in Table 1 showing collection at 1 am (for example)? Or is that supposed to be 1 pm? Note, if these are at night, that should be much clearer in the text and you should discuss the implications (day vs. night, photochemistry, etc.).

Reply: In this study, the particles were all collected in the morning and midnight when the MLH was the lowest and the height of the tower can reach the MLH. Therefore, we can compare the particles at ground level and above the MLH. We have added some sentences in the manuscript in sample collection part. Please see line 121-123.

d. Minor errors in grammar should be corrected to improve readability.

Reply: We have carefully changed the English grammar.
